# Supplementary material for: Prompt deliquescence and efflorescence of aerosol nanoparticles
Source: Copernicus journal article supplement (doi:10.5194/acp-6-4633-2006), 2006-10-17
Supplement: Supplementary file 1 [file acp-6-4633-supplement1.xls]

## Sheet: Fig.2
(a) Electrospray Deliquescence for RHs = RHa
25	0	0	0	0	0	0	0	0.00175401	0.0782235	0.324315	1	0.927927	0.543574	0.106996	0.00358863	0	0	0	0	0	0	0	0	0	0	0	0	0	0	0	0	0	0	0	0
76	0	0	0	0	0	0	0	0	0.102485	0.400241	0.871332	1	0.416059	0.0744358	0.00533589	0	0	0	0	0	0	0	0	0	0	0	0	0	0	0	0	0	0	0	0
78	0	0	0	0	0	0	0	0	0.0244117	0.159272	0.491274	1	0.486261	0.124098	0.0148481	0.0276674	0.0857999	0.18814	0.164972	0.0562666	0.0129325	0.00113347	0	0	0	0	0	0	0	0	0	0	0	0	0
79	0	0	0	0	0	0	0	0	0	0.00239934	0.00692304	0	0.00425941	0.00204846	0.0796583	0.346731	0.996076	1	0.526289	0.165699	0.0225331	0.00150815	0	0	0	0	0	0	0	0	0	0	0	0	0
80	0	0	0	0	0	0	0	0	0	0	0	0	0	0	0.0160044	0.14571	0.463337	1	0.955229	0.418014	0.110304	0.0143178	0	0	0	0	0	0	0	0	0	0	0	0	0
82	0	0	0	0	0	0	0	0	0	0	0	0	0	0	0.0066745	0.0657647	0.318791	0.910582	1	0.775734	0.342099	0.0775659	0.00180724	0	0	0	0	0	0	0	0	0	0	0	0
(b) Atomization Deliquescence for RHs = RHa
RH\Mobility Diameter	7.1	7.37	7.64	7.91	8.2	8.51	8.82	9.14	9.47	9.82	10.2	10.6	10.9	11.3	11.8	12.2	12.6	13.1	13.6	14.1	14.6	15.1	15.7	16.3	16.8	17.5	18.1	18.8	19.5	20.2	20.9	21.7	22.5	23.3	24.1
27	0	0	0	0	0	0	0	0.00709503	0.0790528	0.37413	0.817318	1	0.517838	0.126173	0.0072254	0	0	0	0	0	0	0	0	0	0	0	0	0	0	0	0	0	0	0	0
74	0	0	0	0	0	0	0	0	0.0476213	0.252431	0.74257	1	0.6236	0.16102	0.0170738	0	0	0	0.00835965	0.00402519	0.00387529	0	0	0	0	0	0	0	0	0	0	0	0	0	0
79	0	0	0	0	0	0	0	0.00296193	0.023879	0.239464	0.724315	1	0.706929	0.163472	0.0168656	0.00215598	0.00414948	0.023644	0.038787	0.0213508	0.00796457	0	0	0	0	0	0	0	0	0	0	0	0	0	0
80	0	0	0	0	0	0	0	0	0	0.00536575	0.0339934	0.0531134	0.0363067	0.010722	0.12225	0.408889	0.790662	1	0.704543	0.269464	0.0500165	0.00448069	0	0	0	0	0	0	0	0	0	0	0	0	0
81	0	0	0	0	0	0	0	0	0	0	0	0	0	0.00292714	0.0526927	0.236958	0.753396	1	0.640554	0.208036	0.0624467	0.00646523	0	0	0	0	0	0	0	0	0	0	0	0	0
84	0	0	0	0	0	0	0	0	0	0	0	0	0	0	0.0198093	0.145925	0.466889	0.885796	1	0.628169	0.198027	0.0515072	0.00487459	0	0	0	0	0	0	0	0	0	0	0	0
(c) Electrospray Deliquescence for RHs = RHa + 3%
RH\Mobility Diameter	7.1	7.37	7.64	7.91	8.2	8.51	8.82	9.14	9.47	9.82	10.2	10.6	10.9	11.3	11.8	12.2	12.6	13.1	13.6	14.1	14.6	15.1	15.7	16.3	16.8	17.5	18.1	18.8	19.5	20.2	20.9	21.7	22.5	23.3	24.1
41	0	0	0	0	0	0	0.00477681	0.0633669	0.431783	1	0.996734	0.281445	0.0375034	0	0	0	0	0	0	0	0	0	0	0	0	0	0	0	0	0	0	0	0	0	0
76	0	0	0	0	0	0	0	0	0.0274843	0.266307	1	0.954281	0.356019	0.0405596	0	0	0	0	0	0	0	0	0	0	0	0	0	0	0	0	0	0	0	0	0
78	0	0	0	0	0	0	0	0	0	0	0.20018	0.651145	0.978033	1	0.611663	0.383834	0.120432	0.0275683	0	0	0	0	0	0	0	0	0	0	0	0	0	0	0	0	0
79	0	0	0	0	0	0	0	0	0	0	0	0.0736587	0.226743	0.512616	0.966682	1	0.601801	0.154307	0.0254233	0.00513614	0	0	0	0	0	0	0	0	0	0	0	0	0	0	0
80	0	0	0	0	0	0	0	0	0	0	0	0	0	0.0593077	0.26871	0.857546	1	0.401098	0.0796777	0.00834774	0	0	0	0	0	0	0	0	0	0	0	0	0	0	0
81	0	0	0	0	0	0	0	0	0	0	0	0	0	0	0.0709662	0.461189	1	0.753426	0.211898	0.0304692	0	0	0	0	0	0	0	0	0	0	0	0	0	0	0

## Sheet: Fig.3
Electrospray Efflorescence for RHs = RHa
RH\Mobility Diameter	7.37	7.64	7.91	8.2	8.51	8.82	9.14	9.47	9.82	10.2	10.6	10.9	11.3	11.8	12.2	12.6	13.1	13.6	14.1	14.6	15.1	15.7	16.3	16.8	17.5	18.1	18.8	19.5	20.2	20.9	21.7	22.5	23.3	24.1	25
44	0	0	0	0	0	0	0	0.000851138	0.00129373	0.00406086	0.117788	0.452933	0.836308	1	0.428538	0.0661868	0	0	0	0	0	0	0	0	0	0	0	0	0	0	0	0	0	0	0
35	0	0	0	0	0	0	0.0021825	0.0104894	0.0463349	0.168164	0.369348	0.804879	1	0.586881	0.143924	0.0103523	0	0	0	0	0	0	0	0	0	0	0	0	0	0	0	0	0	0	0
34	0	0	0	0	0	0	0.0030268	0.0738627	0.259186	0.708573	0.947003	1	0.944673	0.621145	0.146014	0.0127211	0	0	0	0	0	0	0	0	0	0	0	0	0	0	0	0	0	0	0
32	0	0	0	0	0	0	0.00233449	0.0872531	0.44399	0.940818	1	0.796054	0.660592	0.332212	0.0741961	0.00877498	0	0	0	0	0	0	0	0	0	0	0	0	0	0	0	0	0	0	0
31	0	0	0	0	0	0	0.0160409	0.104981	0.493498	1	0.968551	0.599705	0.351847	0.168146	0.0300455	0.0028332	0	0	0	0	0	0	0	0	0	0	0	0	0	0	0	0	0	0	0
30	0	0	0	0	0	0	0.0103108	0.109991	0.497781	0.923418	1	0.488629	0.207369	0.0633423	0.0166397	0	0	0	0	0	0	0	0	0	0	0	0	0	0	0	0	0	0	0	0
29	0	0	0	0	0	0	0.0103606	0.135289	0.613704	1	0.867642	0.34086	0.0485453	0.00284934	0	0	0	0	0	0	0	0	0	0	0	0	0	0	0	0	0	0	0	0	0
24	0	0	0	0	0	0	0.0260304	0.156236	0.604302	1	0.819394	0.303736	0.0397051	0	0	0	0	0	0	0	0	0	0	0	0	0	0	0	0	0	0	0	0	0	0

## Sheet: Fig.4
Elect. Deliq. (RHs = RHa)		Atom. Deliq. (RHs = RHa)		Elect. Deliq. (RHs = RHa + 3%)		Elect. Efflor. (RHs = Rha)
RH	GF	RH	GF	RH	GF	RH	GF
4	1.0002	20	1.00364	43.7	1	7	1.00239
6	1.00091	23	1.00611	52.7	1.00175	9	1.00295
7	0.99955	27	1.00393	63.7	1.01557	12	1.0029
14	0.998732	34	1.00365	68.7	1.02052	17	1.00185
20	0.995467	38	1.00631	75.7	1.03312	19	0.999913
25	0.992914	47	1.00203	77.7	1.03648	24	0.997295
30	0.99109	51	1.00282	77.7	1.03783	26	0.998658
38	0.990853	55	1.0041	78.7	1.04344	27	0.999041
47	0.990627	63	1.00709	78.7	1.04954	29	0.99996
50	0.990312	65	1.00733	79.7	1.05492	29	1.00318
56	0.991822	68	1.01107	80	1.06438	30	1.01442
60	0.990548	71	1.0129	80.3	1.07613	31	1.01921
65	0.993603	72	1.01288	81.8	1.1274	32	1.03832
70	0.998963	74	1.01455	83.2	1.20006	34	1.05779
72	1.00964	74	1.01496	83.7	1.25018	35	1.08406
73	1.01	77	1.01342	85.7	1.28281	41	1.10905
74	1.01091	79	1.03343	86.2	1.28859	44	1.12046
76	1.01749	80	1.29214	86.7	1.29817	47	1.12668
78	1.02769	81	1.31157	87.7	1.30369	51	1.13893
79	1.2938	84	1.3383	89	1.31648	54	1.15397
80	1.3058	87	1.34157	89.5	1.33885	62	1.18641
82	1.31961	88	1.35352	90.3	1.34165	68	1.22226
87	1.3551	89	1.36294	90.7	1.34073	72	1.24177
89	1.36788			91.7	1.34879	76	1.2674
91	1.38303			93.1	1.35874	77	1.28266
						84	1.31543
						86	1.34093

## Sheet: Fig.5
60-nm					40-nm					20-nm					10-nm					8-nm					6-nm
Electrospray Deliquescence		Electrospray Efflorescence			Electrospray Deliquescence		Electrospray Efflorescence			Electrospray Deliquescence		Electrospray Efflorescence			Electrospray Deliquescence		Electrospray Efflorescence			Electrospray Deliquescence		Electrospray Efflorescence			Electrospray Deliquescence		Electrospray Efflorescence
RH	GF	RH	GF		RH	GF	RH	GF		RH	GF	RH	GF		RH	GF	RH	GF		RH	GF	RH	GF		RH	GF	RH	GF
3	0.999199	5	1.00017		4	1.00094	9	1.00025		3	1.00082	5	1.00006		4	1.0002	7	1.00239		5	1.00275	7	0.996222		7	1.00024	4	0.996577
3	1.00266	8	1.00649		3	0.999015	10	1.00126		4	1.00087	8	0.999465		6	1.00091	9	1.00295		6	1.00122	7	0.999606		19	1.00011	5	0.999858
3	0.998989	8	1.00799		3	1.00046	12	0.999244		6	0.999414	8	0.999238		7	0.99955	12	1.0029		8	1.00095	7	1.00109		10	0.995001	6	1.00356
5	0.999649	11	1.00233		3	1.00505	15	0.999496		8	0.996779	8	0.997641		14	0.998732	17	1.00185		10	0.999871	8	0.997884		9	0.998814	8	0.998879
8	1.00106	17	1.00349		5	1.0021	23	1.00151		12	0.997185	8	0.996443		20	0.995467	19	0.999913		15	0.998508	12	1.00091		10	0.998806	9	0.99544
14	0.999752	23	1.00067		6	0.996727	30	1.00176		20	0.996435	11	0.995075		25	0.992914	24	0.997295		17	1.00015	15	1.00064		12	0.994242	21	1.00184
18	1.00023	25	0.999834		7	0.995925	35	1.00227		26	0.994165	14	0.997033		30	0.99109	26	0.998658		22	0.994144	18	1.00636		16	0.992838	24	1.00076
19	0.993615	29	0.997837		9	1.00136	36	1.10882		33	0.993292	17	0.998669		38	0.990853	27	0.999041		25	0.991937	24	1.00327		21	0.99097	28	0.997061
21	0.994578	33	1.01314		11	0.997295	37	1.1194		40	0.989744	21	1.00192		47	0.990627	29	0.99996		28	0.987274	29	1.00401		25	0.993573	28	0.993081
26	0.9902	36	1.13015		13	0.998835	39	1.12242		47	0.989853	23	1.00181		50	0.990312	29	1.00318		30	0.990006	32	1.00291		27	0.992899	30	1.00258
31	0.990143	34	1.12516		17	1.00027	41	1.13123		52	0.990312	26	1.00194		56	0.991822	30	1.00144		32	0.98248	33	1.04326		28	0.987034	30	0.994536
34	0.991721	33	1.12349		20	1.00136	45	1.1539		56	0.990691	28	1.00327		60	0.990548	31	1.00192		33	0.982396	31	1.00113		29	0.984361	32	0.998496
40	0.991251	34	1.12532		24	0.992095	52	1.18766		59	0.990777	30	1.002		65	0.993603	32	1.00383		39	0.981288	34	1.03944		36	0.983491	33	1.0013
45	0.988709	38	1.13314		26	0.996534				61	0.992985	34	1.001		70	0.998963	34	1.00779		50	0.981192	36	1.0466		34	0.983496	34	1.031
53	0.992895	42	1.16093		28	0.994176				66	0.993803	35	1.08761		72	1.00964	35	1.08406		56	0.982989	38	1.04681		40	0.982186	36	1.0321
59	0.9927	47	1.18273		31	0.995149				68	0.996462	36	1.09119		73	1.01	41	1.10905		61	0.986242	40	1.05322		47	0.981338	37	1.0349
65	0.992833	49	1.19787		35	0.995235				70	0.998077	37	1.09575		75	1.01091	44	1.12046		66	0.98853	44	1.0682		55	0.981213	38	1.03297
70	0.99595	56	1.22832		40	0.991377				72	0.997595	39	1.09954		76	1.01749	47	1.12668		70	0.991277	49	1.08325		60	0.983067	40	1.04033
74	0.998305	62	1.26509		44	0.992738				72	0.999916	40	1.10461		78	1.02769	51	1.13893		73	0.993523	54	1.10496		63	0.983725	41	1.04364
75	0.997258	72	1.35594		47	0.996058				74	1.00392	41	1.11148		80	1.2938	54	1.15397		76	0.997059	58	1.12969		66	0.987369	46	1.05606
77	0.99579				51	0.996578				75	1.00544	43	1.11828		83	1.3058	62	1.18641		78	1.00198	64	1.14904		69	0.989272	51	1.05675
78	0.996936				59	0.997627				76	1.00666	44	1.12184		85	1.31961	68	1.22226		78	1.00099	67	1.17028		70	0.995906	55	1.07522
78	1.00312				63	0.999978				77	1.00879	47	1.13407		89	1.3551	72	1.24177		79	1.00021	70	1.18164		72	0.996088	61	1.09865
79	1.00601				65	0.999261				77	1.01023	53	1.1651		90	1.36788	76	1.2674		80	1.00393	73	1.20148		73	1.00592	68	1.11625
79	1.01406				71	1.00907				78	1.00927	57	1.17607		91	1.38303	77	1.28266		80	1.00624	76	1.21976		75	0.998629	70	1.13707
80	1.44095				74	1.00893				79	1.01546	64	1.22621				84	1.31543		80	1.01061	78	1.21736		76	1.00405	73	1.1523
81	1.45797				77	1.02242				80	1.01876	70	1.26306				86	1.34093		81	1.24694	79	1.23343		77	1.00733	75	1.16752
83	1.4763				79	1.03262				81	1.02297									81	1.25343	80	1.2386		78	1.00826	77	1.18015
84	1.4893				80	1.4228				82	1.38331									82	1.25218	83	1.26776		78	1.00712	79	1.17599
85	1.50402				81	1.42787				82	1.38973									83	1.25843	85	1.27491		80	1.01208	80	1.19685
86	1.51951				82	1.45399				83	1.3917									83	1.26592	87	1.29715		81	1.0355	84	1.22002
87	1.54091				83	1.46142				83	1.39659									84	1.27216	14	0.999297		83	1.19015	85	1.23528
88	1.55561				84	1.47725				84	1.40287									85	1.27867	12	1.00286		83	1.20911	86	1.24704
88	1.59335				85	1.486				84	1.40633									86	1.2908	10	1.00908		84	1.20836
89	1.5878				85	1.5049				85	1.41678									87	1.29571	9	1.00579		85	1.21649
89	1.60379				86	1.51996				85	1.42091									88	1.29909				86	1.21834
					87	1.53147				86	1.43205									89	1.31352				86	1.22666
					89	1.57484				87	1.44365									6	0.996124				87	1.23229
										88	1.45904									6	0.9974				88	1.24801
										89	1.4796									6	1.00584				88	1.23848
										90	1.50144									5	1.00483				89	1.25268
																									91	1.25287
